# Supplementary material for: Effect of Geographical Indication Information on Consumer Acceptability of Cooked Aromatic Rice
Source: PubMed Central journal article supplement (PMC7763253; doi:10.3390/foods9121843), 2020-12-11
Supplement: foods-09-01843-s001.pdf [file foods-09-01843-s001.pdf]

**Table S1. Physicochemical properties of the uncooked aromatic rice samples used in this study**

| Physicochemical properties             | ARoma 17<br>(ARV)                          | Jazzman-2<br>(LAV)                 | Jasmine<br>(THV)                    | <i>P</i> -value |
|----------------------------------------|--------------------------------------------|------------------------------------|-------------------------------------|-----------------|
| Amylose (% db.)                        | 12.57 <sup>a</sup><br>(± 0.3) <sup>1</sup> | 13.18 <sup>a</sup><br>(± 0.10)     | 11.20 <sup>b</sup><br>(± 0.0)       | 0.003           |
| Crude protein (%)                      | 7.74 <sup>a</sup><br>(± 0.05)              | 7.53 <sup>b</sup><br>(± 0.07)      | 7.26 <sup>c</sup><br>(± 0.06)       | < 0.001         |
| Surface lipid content (%) <sup>2</sup> | 0.57 <sup>b</sup><br>(± 0.01)              | 0.66 <sup>a</sup><br>(± 0.02)      | 0.38 <sup>c</sup><br>(± 0.01)       | < 0.001         |
| Pasting temperature (°c)               | 87.07 <sup>a</sup><br>(± 0.09)             | 87.07 <sup>a</sup><br>(± 0.05)     | 76.07 <sup>b</sup><br>(± 0.05)      | < 0.001         |
| Peak viscosity (cP)                    | 3,428.67 <sup>b</sup><br>(± 72.6)          | 3,040.34 <sup>c</sup><br>(± 61.16) | 4,165.00 <sup>a</sup><br>(± 73.96)  | < 0.001         |
| Final viscosity (cP)                   | 3,006.00 <sup>b</sup><br>(± 22.69)         | 3,657 <sup>a</sup><br>(± 27.28)    | 3,063.34 <sup>b</sup><br>(± 25.96)  | < 0.001         |
| Setback (cP)                           | -422.67 <sup>b</sup><br>(± 88.13)          | 616.67 <sup>a</sup><br>(± 84.31)   | 11,001.67 <sup>c</sup><br>(± 62.94) | < 0.001         |
| L*                                     | 69.43 <sup>b</sup><br>(± 0.18)             | 67.24 <sup>c</sup><br>(± 0.28)     | 72.78 <sup>a</sup><br>(± 0.36)      | < 0.001         |
| a*                                     | 0.63 <sup>a</sup><br>(± 0.29)              | 0.94 <sup>a</sup><br>(± 0.20)      | -0.82 <sup>b</sup><br>(± 0.24)      | 0.001           |
| b*                                     | 17.53 <sup>b</sup><br>(± 0.17)             | 19.25 <sup>a</sup><br>(± 0.32)     | 17.60 <sup>b</sup><br>(± 0.34)      | 0.001           |

<sup>1</sup>Values represent the mean (± standard deviation) of triplicate measurements. Different superscript letters within a row indicate a significant difference ( $P < 0.05$ ) determined by *post hoc* test using Tukey's Honest Significant Difference.

<sup>2</sup>Surface lipid content was measured by NIR spectroscopy (NIR-DA 7200, Perten Instruments, Huddinge, Sweden).

**Table S2. Sensory attributes of the three cooked rice samples evaluated by five trained panelists in the descriptive sensory analysis**

| Attributes          | Cooked aromatic rice Samples            |                             |                             | <i>F</i> -value ( <i>P</i> -value) |                 |                |             |             |              |
|---------------------|-----------------------------------------|-----------------------------|-----------------------------|------------------------------------|-----------------|----------------|-------------|-------------|--------------|
|                     | ARoma 17 (ARV)                          | Jazzman-2 (LAV)             | Jasmine (THV)               | Sample (S)                         | Assessor (A)    | Repetition (R) | S × A       | A × R       | S × R        |
| <b>Appearance</b>   |                                         |                             |                             |                                    |                 |                |             |             |              |
| Degree of Whiteness | 9.90 <sup>b</sup> (± 1.57) <sup>1</sup> | 9.30 <sup>b</sup> (± 2.01)  | 10.84 <sup>a</sup> (± 1.08) | 29.98 (< 0.001)                    | 76.32 (< 0.001) | 1.60 (0.23)    | 4.38 (0.01) | 1.80 (0.15) | 1.99 (0.15)  |
| Glossiness          | 8.77 <sup>a</sup> (± 2.14)              | 3.98 <sup>b</sup> (± 1.06)  | 9.81 <sup>a</sup> (± 2.16)  | 103.46 (< 0.001)                   | 12.71 (< 0.001) | 0.63 (0.54)    | 4.35 (0.01) | 0.38 (0.92) | 1.00 (0.44)  |
| Grain Integrity     | 4.29 <sup>a</sup> (± 1.50)              | 4.38 <sup>a</sup> (± 1.16)  | 4.44 <sup>a</sup> (± 1.48)  | 0.05 (0.95)                        | 2.41 (0.09)     | 0.30 (0.75)    | 1.69 (0.18) | 0.98 (0.48) | 0.88 (0.50)  |
| Color Uniformity    | 11.8 <sup>b</sup> (± 1.75)              | 10.46 <sup>c</sup> (± 1.68) | 13.38 <sup>a</sup> (± 0.77) | 50.40 (< 0.001)                    | 24.80 (< 0.001) | 0.60 (0.56)    | 2.16 (0.09) | 2.09 (0.10) | 0.38 (0.82)  |
| <b>Aroma</b>        |                                         |                             |                             |                                    |                 |                |             |             |              |
| Sulfur              | 6.96 <sup>a</sup> (± 3.24)              | 6.69 <sup>a</sup> (± 3.09)  | 4.16 <sup>b</sup> (± 3.53)  | 8.62 (< 0.001)                     | 14.78 (< 0.001) | 0.91 (0.42)    | 2.16 (0.09) | 1.02 (0.46) | 1.67 (0.21)  |
| Floral              | 3.04 <sup>a</sup> (± 1.60)              | 4.35 <sup>a</sup> (± 1.92)  | 4.48 <sup>a</sup> (± 1.81)  | 2.82 (0.09)                        | 1.92 (0.16)     | 0.48 (0.63)    | 1.03 (0.46) | 0.40 (0.90) | 0.76 (0.56)  |
| Starchy             | 7.42 <sup>a</sup> (± 2.05)              | 7.08 <sup>a</sup> (± 3.17)  | 8.88 <sup>a</sup> (± 1.84)  | 2.75 (0.09)                        | 3.17 (0.04)     | 0.88 (0.43)    | 0.86 (0.57) | 1.36 (0.29) | 0.25 (0.91)  |
| Grainy              | 7.56 <sup>b</sup> (± 3.07)              | 7.99 <sup>b</sup> (± 2.83)  | 9.47 <sup>a</sup> (± 1.66)  | 4.76 (0.02)                        | 8.44 (< 0.001)  | 0.12 (0.89)    | 0.60 (0.76) | 2.96 (0.03) | 2.50 (0.08)  |
| Feedy               | 3.60 <sup>a</sup> (± 2.93)              | 4.13 <sup>a</sup> (± 2.92)  | 3.63 <sup>a</sup> (± 2.21)  | 0.70 (0.51)                        | 22.00 (< 0.001) | 3.85 (0.04)    | 1.86 (0.14) | 3.53 (0.02) | 2.18 (0.12)  |
| Nutty               | 5.34 <sup>b</sup> (± 3.12)              | 5.06 <sup>b</sup> (± 3.17)  | 7.29 <sup>a</sup> (± 2.93)  | 6.59 (0.01)                        | 17.85 (< 0.001) | 0.77 (0.48)    | 1.17 (0.37) | 2.21 (0.09) | 0.43 (0.79)  |
| <b>Flavor</b>       |                                         |                             |                             |                                    |                 |                |             |             |              |
| Sulfur              | 3.88 <sup>a</sup> (± 1.73)              | 3.76 <sup>a</sup> (± 1.44)  | 3.60 <sup>a</sup> (± 1.60)  | 0.16 (0.85)                        | 6.14 (< 0.001)  | 1.21 (0.32)    | 0.46 (0.87) | 1.24 (0.34) | 10.00 (0.60) |
| Floral              | 2.43 <sup>a</sup> (± 1.53)              | 2.71 <sup>a</sup> (± 1.59)  | 3.42 <sup>a</sup> (± 2.00)  | 1.27 (0.31)                        | 1.11 (0.39)     | 1.49 (0.26)    | 1.09 (0.42) | 1.04 (0.45) | 0.56 (0.69)  |
| Sweet Aromatics     | 2.32 <sup>a</sup> (± 0.90)              | 1.73 <sup>a</sup> (± 0.83)  | 2.66 <sup>a</sup> (± 1.64)  | 1.88 (0.19)                        | 2.12 (0.13)     | 0.82 (0.46)    | 0.45 (0.87) | 0.58 (0.78) | 0.15 (0.96)  |
| Starchy             | 9.71 <sup>a</sup> (± 1.80)              | 9.15 <sup>a</sup> (± 2.95)  | 9.82 <sup>a</sup> (± 1.78)  | 0.57 (0.58)                        | 2.21 (0.11)     | 1.09 (0.36)    | 1.06 (0.43) | 3.72 (0.01) | 0.30 (0.87)  |
| Grainy              | 6.58 <sup>a</sup> (± 2.80)              | 6.76 <sup>a</sup> (± 3.11)  | 5.57 <sup>a</sup> (± 2.53)  | 1.10 (0.36)                        | 4.90 (0.01)     | 0.48 (0.63)    | 1.69 (0.18) | 1.60 (0.20) | 0.28 (0.89)  |
| Feedy               | 1.91 <sup>ab</sup> (± 1.45)             | 1.94 <sup>a</sup> (± 1.48)  | 0.89 <sup>b</sup> (± 0.72)  | 5.08 (0.02)                        | 3.74 (0.03)     | 0.76 (0.49)    | 1.18 (0.37) | 1.72 (0.17) | 2.97 (0.05)  |
| Wet Cardboard       | 3.44 <sup>a</sup> (± 2.29)              | 3.96 <sup>a</sup> (± 2.81)  | 3.78 <sup>a</sup> (± 1.62)  | 0.38 (0.69)                        | 5.14 (0.01)     | 5.37 (0.02)    | 0.91 (0.53) | 2.47 (0.06) | 2.26 (0.11)  |

|                      |                             |                             |                             |                 |                 |             |             |             |             |
|----------------------|-----------------------------|-----------------------------|-----------------------------|-----------------|-----------------|-------------|-------------|-------------|-------------|
| Nutty                | 4.50 <sup>a</sup> (± 2.39)  | 4.70 <sup>a</sup> (± 2.27)  | 4.32 <sup>a</sup> (± 2.15)  | 0.24 (0.79)     | 14.25 (< 0.001) | 4.34 (0.03) | 1.29 (0.32) | 0.93 (0.52) | 0.58 (0.68) |
| Earthy/Dirty         | 0.43 <sup>a</sup> (± 0.38)  | 0.84 <sup>a</sup> (± 0.71)  | 0.76 <sup>a</sup> (± 1.00)  | 3.22 (0.07)     | 8.27 (< 0.001)  | 3.36 (0.06) | 2.76 (0.04) | 3.26 (0.02) | 2.04 (0.14) |
| Metallic             | 1.83 <sup>a</sup> (± 1.22)  | 2.22 <sup>a</sup> (± 1.18)  | 2.14 <sup>a</sup> (± 1.60)  | 0.57 (0.58)     | 6.26 (< 0.001)  | 0.90 (0.43) | 1.32 (0.30) | 2.08 (0.10) | 0.68 (0.62) |
| <b>Basic tastes</b>  |                             |                             |                             |                 |                 |             |             |             |             |
| Sweet taste          | 0.78 <sup>a</sup> (± 0.50)  | 0.69 <sup>a</sup> (± 0.37)  | 0.86 <sup>a</sup> (± 0.53)  | 1.51 (0.25)     | 14.60 (< 0.001) | 1.07 (0.37) | 3.09 (0.03) | 2.75 (0.04) | 1.82 (0.17) |
| Bitter taste         | 0.84 <sup>a</sup> (± 0.77)  | 1.36 <sup>a</sup> (± 1.43)  | 0.66 <sup>a</sup> (± 0.88)  | 3.46 (0.06)     | 10.25 (< 0.001) | 0.39 (0.68) | 2.95 (0.03) | 0.59 (0.77) | 0.88 (0.50) |
| Salty taste          | 0.86 <sup>a</sup> (± 0.90)  | 0.75 <sup>a</sup> (± 0.62)  | 0.90 <sup>a</sup> (± 0.67)  | 0.51 (0.61)     | 20.26 (< 0.001) | 0.92 (0.42) | 1.32 (0.30) | 2.80 (0.04) | 2.20 (0.12) |
| <b>Texture</b>       |                             |                             |                             |                 |                 |             |             |             |             |
| Hardness             | 3.39 <sup>b</sup> (± 0.60)  | 4.23 <sup>a</sup> (± 0.66)  | 2.86 <sup>b</sup> (± 0.87)  | 16.48 (< 0.001) | 2.97 (0.05)     | 0.58 (0.57) | 2.17 (0.09) | 0.61 (0.76) | 0.24 (0.91) |
| Cohesiveness of Mass | 8.03 <sup>a</sup> (± 2.37)  | 6.44 <sup>a</sup> (± 2.96)  | 8.26 <sup>a</sup> (± 3.03)  | 4.16 (0.04)     | 12.72 (< 0.001) | 1.82 (0.19) | 1.18 (0.37) | 1.91 (0.13) | 0.94 (0.46) |
| Toothpull            | 4.32 <sup>a</sup> (± 1.49)  | 3.36 <sup>a</sup> (± 1.37)  | 3.78 <sup>a</sup> (± 1.29)  | 3.95 (0.04)     | 10.48 (< 0.001) | 2.76 (0.09) | 1.55 (0.22) | 1.93 (0.13) | 1.21 (0.35) |
| Toothpack            | 4.70 <sup>a</sup> (± 2.27)  | 5.17 <sup>a</sup> (± 1.97)  | 4.42 <sup>a</sup> (± 2.30)  | 0.69 (0.52)     | 7.49 (< 0.001)  | 0.79 (0.47) | 0.81 (0.60) | 1.63 (0.19) | 0.41 (0.80) |
| Mouthcoat            | 7.76 <sup>a</sup> (± 1.79)  | 6.22 <sup>a</sup> (± 2.86)  | 6.55 <sup>a</sup> (± 2.36)  | 2.83 (0.09)     | 2.42 (0.09)     | 1.29 (0.30) | 2.24 (0.08) | 3.02 (0.03) | 0.60 (0.67) |
| Loose Particles      | 5.10 <sup>a</sup> (± 2.01)  | 5.50 <sup>a</sup> (± 2.09)  | 5.64 <sup>a</sup> (± 1.89)  | 0.48 (0.63)     | 4.45 (0.01)     | 0.02 (0.98) | 2.76 (0.04) | 1.65 (0.19) | 0.72 (0.59) |
| Manual Stickiness    | 11.16 <sup>a</sup> (± 1.00) | 10.67 <sup>a</sup> (± 1.71) | 11.47 <sup>a</sup> (± 1.07) | 4.86 (0.02)     | 22.56 (< 0.001) | 1.06 (0.37) | 2.10 (0.10) | 2.43 (0.06) | 1.41 (0.28) |

<sup>1</sup>Values represent the mean (± standard deviation) of triplicate measurements. Different superscript letters within a row indicate a significant difference ( $P < 0.05$ ) determined by *post hoc* test using Tukey's Honest Significant Difference (HSD).

**Table S3. Terms, definitions, and reference intensities used in descriptive sensory analysis of cooked aromatic rice samples**

| <b>Terms</b>        | <b>Definitions</b>                                                                        | <b>References<sup>1</sup></b> |
|---------------------|-------------------------------------------------------------------------------------------|-------------------------------|
| <i>Appearance</i>   |                                                                                           |                               |
| Degree of Whiteness | The degree to which the sample is pure white.                                             | Ref A: 3.0<br>Ref C: 13.0     |
| Glossiness          | The degree to which the kernel shines.                                                    | Ref C: 6.0                    |
| Grain Integrity     | The degree to which the kernels are cracked or split apart.                               | Ref B: 12.0                   |
| Color Uniformity    | The degree to which the rice sample is uniform in color.                                  | Ref C: 13.0                   |
| <i>Aroma</i>        |                                                                                           |                               |
| Sulfur              | The aroma associated with struck matches and boiled eggs.                                 | Ref G: 2.0<br>Ref F: 8.0      |
| Floral              | The aroma associated with a non-specific floral note and sometimes described as minty.    | Ref F: 4.0                    |
| Starchy             | The aroma associated with the starch of a particular grain source.                        | Ref G: 6.0<br>Ref D: 10.0     |
| Grainy              | A general term used to describe the aroma of raw or cooked grains and popcorn             | Ref F: 7.0<br>Ref E: 12.0     |
| Feedy               | The aroma associated with a mixture of grains reminiscent of animal feed.                 | Ref E: 6.0                    |
| Nutty               | The aroma associated with nuts or nutmeats that cannot be tied to a specific origin.      | Ref E: 12.0                   |
| <i>Flavor</i>       |                                                                                           |                               |
| Sulfur              | The aromatic associated with struck matches and boiled eggs.                              | Ref G: 2.0<br>Ref F: 8.0      |
| Floral              | The aromatic associated with a non-specific floral note and sometimes described as minty. | Ref F: 4.0                    |
| Sweet Aromatics     | Aromatics associated to sweet tasting products but not 'basic taste sweet'                | Ref E: 5.0                    |
| Starchy             | The aromatic associated with the starch of a particular grain source.                     | Ref G: 6.0<br>Ref D: 10.0     |
| Grainy              | A general term used to describe the aromatics of raw or cooked grains and popcorn         | Ref F: 7.0<br>Ref E: 12.0     |
| Feedy               | The aromatic associated with a mixture of grains reminiscent of animal feed.              | Ref E: 6.0                    |
| Wet Cardboard       | The aromatic associated with early stages of oxidation.                                   | Ref G: 3.0<br>Ref D: 7.0      |
| Nutty               | The aromatic associated with nuts or nutmeats that cannot be tied to a specific origin.   | Ref E: 12.0                   |
| Earthy/Dirty        | Aromatic associated with damp earth aromas.                                               | Ref D: 3.0                    |

|                      |                                                                                                                            |                                                        |
|----------------------|----------------------------------------------------------------------------------------------------------------------------|--------------------------------------------------------|
| Metallic             | Aromatic associated with metals, tinny or irony.                                                                           | Ref B: 3.0                                             |
| <b>Basic Taste</b>   |                                                                                                                            |                                                        |
| Sweet                | The basic taste, perceived on the tongue, stimulated by sugars and high potency sweeteners.                                | Sucrose solution 2% (v/v): 2.0<br>5% (v/v): 5.0        |
| Bitter               | The basic taste, perceived on the tongue, stimulated by substances such as quinine, caffeine, and certain other alkaloids. | Caffeine solution 0.05% (v/v): 2.0<br>0.08% (v/v): 5.0 |
| Salt                 | The basic taste, perceived on the tongue, stimulated by sodium salt, especially sodium chloride.                           | NaCl solution 0.20% (v/v): 2.0<br>0.35% (v/v): 5.0     |
| <b>Texture</b>       |                                                                                                                            |                                                        |
| Hardness             | The force required to compress the sample.                                                                                 | Ref D: 2.0<br>Ref B: 6.0<br>Ref C: 10.0                |
| Cohesiveness of Mass | The amount the chewed sample holds together.                                                                               | Ref C: 3.0<br>Ref A: 7.0<br>Ref D: 12.0                |
| Toothpull            | The force required to separate the teeth during mastication.                                                               | Ref A: 6.0                                             |
| Toothpack            | The amount of product packed into the crowns of your teeth after mastication.                                              | Ref B: 3.0<br>Ref C: 8.0                               |
| Mouthcoat            | The amount and degree of residue felt by the tongue when moved over the surface of the mouth.                              | Ref D: 4.0<br>Ref C: 13.0                              |
| Loose Particles      | The amount of particles remaining in and on the surface of the mouth after swallowing.                                     | Ref D: 4.0<br>Ref C: 13.0                              |
| Manual Stickiness    | The force required to separate the fingers after compressing the sample between the thumb and forefinger.                  | Ref B: 2.0<br>Ref D: 10.0                              |

<sup>1</sup>Reference A: 30 g Riceland Brown Rice (water: rice ratio = 3.5:1; cooking time = 35 min) (Riceland Foods, Stuttgart, AR, USA)

Reference B: 30 g Uncle Ben's Converted Brown Rice (water: rice ratio = 3.5:1; cooking time = 25 min) (Mars Food, McLean, VA, USA)

Reference C: 30 g Riceland Brown Rice (water: rice ratio = 3.5:1; cooking time = 25 min) (Riceland Foods, Stuttgart, AR, USA)

Reference D: 30 g Riceland Extra Long- Grain Rice (water: rice ratio = 3.5:1; cooking time = 25 min) (Riceland Foods, Stuttgart, AR, USA)

Reference E: 30 g Golden Star Jasmine Brown Rice (water: rice ratio = 2.5:1; cooking time = 35 min) (Golden Star Trading, Torrance, CA, USA)

Reference F: Golden Star Jasmine Rice (water: rice ratio = 2:1; cooking time = 25 min) (Golden Star Trading, Torrance, CA, USA)

Reference G: 30 g Mahatma Jasmine Rice (water: rice ratio = 2:1; cooking time = 25 min) (Riviana Foods, Houston, TX, USA).

**Table S4. A list of terms that have been reported by at least 10 out of 99 consumer participants with respect to what they liked for the three cooked aromatic rice samples in the two geographical indication (GI) information conditions**

(*N* = 99)

| <b>Rice variety</b> | <b>GI information condition</b> | <b>Terms</b>   | <b>Frequency</b> |
|---------------------|---------------------------------|----------------|------------------|
| ARoma 17 (ARV)      | No information                  | Flavor         | 29               |
|                     |                                 | Texture        | 21               |
|                     |                                 | Aroma          | 18               |
|                     |                                 | Color          | 15               |
|                     |                                 | Appearance     | 13               |
|                     |                                 | Stickiness     | 12               |
|                     |                                 | Taste          | 11               |
|                     |                                 | Chewiness      | 10               |
|                     | GI information                  | Flavor         | 31               |
|                     |                                 | Texture        | 22               |
|                     |                                 | Aroma          | 14               |
|                     |                                 | Color          | 14               |
|                     |                                 | Appearance     | 11               |
|                     |                                 | Chewiness      | 10               |
| Jazz-2 (LAV)        | No information                  | Texture        | 28               |
|                     |                                 | Flavor         | 23               |
|                     |                                 | Aroma          | 17               |
|                     |                                 | Chewiness      | 14               |
|                     |                                 | Firmness       | 12               |
|                     |                                 | Stickiness     | 12               |
|                     |                                 | Taste          | 11               |
|                     |                                 | GI information | Texture          |
|                     | Flavor                          |                | 27               |
|                     | Appearance                      |                | 15               |
|                     | Aroma                           |                | 13               |
|                     | Stickiness                      |                | 13               |
|                     | Taste                           |                | 13               |
|                     | Jasmine (THV)                   | No information | Flavor           |
| Aroma               |                                 |                | 21               |
| Texture             |                                 |                | 19               |
| Appearance          |                                 |                | 17               |
| Color               |                                 |                | 14               |
| Stickiness          |                                 |                | 13               |
| Taste               |                                 |                | 12               |
| GI information      |                                 |                | Flavor           |
|                     |                                 | Texture        | 25               |

|            |    |
|------------|----|
| Aroma      | 24 |
| Appearance | 17 |
| Color      | 13 |
| Stickiness | 11 |

---

**Table S5. A list of terms that have been reported by at least 9 out of 99 consumer participants with respect to what they disliked for the three cooked aromatic rice samples in the two geographical indication (GI) information conditions**

(*N* = 99)

| <b>Rice variety</b> | <b>GI information condition</b> | <b>Terms</b> | <b>Frequency</b> |
|---------------------|---------------------------------|--------------|------------------|
| ARoma 17 (ARV)      | No information                  | Stickiness   | 32               |
|                     |                                 | Flavor       | 19               |
|                     |                                 | Bland flavor | 14               |
|                     |                                 | Saltiness    | 14               |
|                     |                                 | Chewiness    | 13               |
|                     | GI information                  | Stickiness   | 38               |
|                     |                                 | Flavor       | 23               |
|                     |                                 | Chewiness    | 16               |
|                     |                                 | Saltiness    | 15               |
|                     |                                 |              |                  |
| Jazz-2 (LAV)        | No information                  | Flavor       | 20               |
|                     |                                 | Bitterness   | 18               |
|                     |                                 | Color        | 17               |
|                     |                                 | Dry          | 14               |
|                     |                                 | Taste        | 13               |
|                     |                                 | Aftertaste   | 10               |
|                     |                                 | Bland flavor | 10               |
|                     |                                 |              |                  |
|                     | GI information                  | Flavor       | 20               |
|                     |                                 | Bitterness   | 14               |
|                     |                                 | Dry          | 14               |
|                     |                                 | Color        | 14               |
|                     |                                 | Chewiness    | 13               |
|                     |                                 | Saltiness    | 13               |
| Jasmine (THV)       | No information                  | Stickiness   | 29               |
|                     |                                 | Flavor       | 24               |
|                     |                                 | Bland flavor | 12               |
|                     |                                 | Chewiness    | 12               |
|                     | GI information                  | Stickiness   | 46               |
|                     |                                 | Flavor       | 15               |
|                     |                                 | Chewiness    | 12               |
|                     |                                 | Saltiness    | 12               |
|                     | Aroma                           | 10           |                  |
|                     | Bland flavor                    | 10           |                  |
